# Supplementary material for: The effect of static versus dynamic stimuli on visual processing of sexual cues in androphilic women and gynephilic men
Source: R Soc Open Sci. 2018 Jun 13;5(6):172286. doi: 10.1098/rsos.172286 (PMC6030282; doi:10.1098/rsos.172286)
Supplement: Visual Attention and Self-report Data [file rsos172286supp1.xlsx]

## Sheet: Sheet1
ID	GENDER	AGE	Corrected_Vision	LTFF_IMG_MALETARGET	LTFF_IMG_FEMALETARGET	TFD_IMG_MALETARGET	TFD_IMG_FEMALETARGET	SRA_IMG_MALETARGET	SRA_IMG_FEMALETARGET	TFD_VID_MALETARGET	TFD_VID_FEMALETARGET	SRA_VID_MALETARGET	SRA_VID_FEMALETARGET	LTFF_IMG_INDEX	TFD_IMG_INDEX	TFD_VID_INDEX	SRA_IMG_INDEX	SRA_VID_INDEX	TFD_VID_Background	AROUSAL_VID
F1	Woman	18	Corrected to normal vision	2.14	1.01	3.53	4.45	2.45	2.03	4.64	13.36	1.65	2.3	-1.12	-0.09	-0.44	0.43	-0.65	2	4.25
F2	Woman	19	Normal vision	1.23	0.67	4.85	4.59	4.03	2.05	7.3	11.07	3.3	2.7	-0.56	0.03	-0.19	1.98	0.6	1.63	4
F3	Woman	18	Normal vision	0.78	1.44	4.67	3.06	3.33	1.98	8.24	10.45	1.2	2.25	0.66	0.16	-0.11	1.35	-1.05	1.31	3.25
F4	Woman	18	Normal vision	1.24	0.79	5.11	3.18	1.13	0.38	5.98	11.14	1.05	0.7	-0.45	0.19	-0.26	0.75	0.35	2.87	3.25
F5	Woman	20	Corrected to normal vision	1	0.77	5.67	3	3.53	0.2	5.97	12.07	3.35	0.35	-0.23	0.27	-0.31	3.32	3	1.96	2.5
F6	Woman	20	Normal vision	1.61	2.18	5.62	3.47	1.18	0	7.77	10.14	1.3	0	0.58	0.22	-0.12	1.18	1.3	2.1	2.75
F7	Woman	19	Normal vision	1.52	1.47	5.09	3.94	1.88	0.95	7.31	7.41	2.1	0.9	-0.05	0.11	-0.01	0.93	1.2	5.28	2
F10	Woman	19	Normal vision	1.27	1.45	3.83	3.45	0.85	0.33	7.6	7.96	0.4	0	0.18	0.04	-0.02	0.52	0.4	4.45	2.75
F11	Woman	19	Normal vision	0.55	1.24	7.5	1.57	3.03	0.03	9.2	8.69	1.7	0.1	0.7	0.59	0.03	3	1.6	2.11	3.25
F12	Woman	21	Corrected to normal vision	3.01	1.89	2.78	3.49	1.8	1.68	7.93	8.48	2.05	2.55	-1.13	-0.03	-0.03	0.13	-0.5	3.6	3
F13	Woman	20	Normal vision	1.58	1.66	4.59	4.69	2.38	1.53	6.89	11.71	1.8	2.15	0.09	-0.01	-0.24	0.85	-0.35	1.41	3.25
F14	Woman	18	Normal vision	1.31	0.94	4.68	4.02	2.63	1.9	3.23	8.66	2.2	2.1	-0.38	0.07	-0.27	0.73	0.1	3.11	3
F15	Woman	18	Normal vision	0.77	0.92	4.91	4.05	1.05	0.05	6.97	10.73	0.5	0.2	0.16	0.09	-0.19	1	0.3	2.3	3.5
F16	Woman	18	Corrected to normal vision	0.78	0.58	3.28	2.92	0.63	0.38	4.9	9.02	0.6	2.45	-0.2	0.04	-0.21	0.25	-1.85	6.08	3.25
F18	Woman	18	Normal vision	1.38	1.39	4.56	3.06	2.13	0.18	4.46	10.9	1	0.3	0.01	0.15	-0.32	1.95	0.7	4.64	2.25
F19	Woman	19	Normal vision	1.41	0.76	4.54	4.32	2.88	0.15	5.83	10.91	2.75	0.5	-0.66	0.02	-0.25	2.73	2.25	3.27	3.25
F23	Woman	18	Normal vision	1.3	0.93	5.06	4.37	0.88	0.63	4.78	13.04	1	0.5	-0.38	0.07	-0.41	0.25	0.5	2.18	3
F24	Woman	21	Corrected to normal vision	0.94	0.57	5.55	2.74	2.5	0.15	6.84	7.66	2.4	0.45	-0.37	0.28	-0.04	2.35	1.95	5.51	3
F25	Woman	21	Corrected to normal vision	1.22	1.48	5.88	3.16	1.95	0.45	10.46	8.1	1.6	0.6	0.26	0.27	0.12	1.5	1	1.44	2
F26	Woman	20	Corrected to normal vision	1.47	0.93	5.41	2.98	3.05	0.98	5.01	10.57	1.55	1.7	-0.54	0.24	-0.28	2.07	-0.15	4.42	5.75
F28	Woman	19	Normal vision	1.53	1.41	5.37	4.05	2.75	0.38	10.37	6.75	2.5	0.45	-0.12	0.13	0.18	2.38	2.05	2.88	3.25
F32	Woman	20	Normal vision	1.62	1.56	5.03	4.32	2.43	1.98	4.54	8.96	2.45	1.9	-0.05	0.07	-0.22	0.45	0.55	6.5	4.5
F33	Woman	18	Corrected to normal vision	1.63	1.36	4.39	4.14	3.68	3.68	5.75	11.82	3	3.8	-0.27	0.03	-0.3	0	-0.8	2.44	4.75
F34	Woman	18	Normal vision	1.6	1.25	4.58	3.53	1.08	0.45	6.23	9.43	0.35	1.05	-0.35	0.11	-0.16	0.63	-0.7	4.34	2.5
F35	Woman	19	Normal vision	1.2	1.92	6	3.3	2.73	0.85	10.8	7.38	1.65	0.4	0.73	0.27	0.17	1.88	1.25	1.82	3.5
F36	Woman	23	Corrected to normal vision	0.86	1.1	5.42	2.07	3.25	0.08	9.25	8.68	2.9	0.05	0.24	0.34	0.03	3.18	2.85	2.08	3
F37	Woman	21	Corrected to normal vision	0.71	1.87	4.62	3.51	2.15	0	4.43	11.43	2.8	0.45	1.17	0.11	-0.35	2.15	2.35	4.13	4.5
F38	Woman	18	Normal vision	2.6	1.54	4.94	3.84	3.03	1.23	4.53	7.71	2.9	1.05	-1.06	0.11	-0.16	1.8	1.85	7.76	6
F39	Woman	18	Normal vision	0.57	0.8	1.89	0.83	0.58	0	5.46	2.53	0.4	0	0.23	0.11	0.15	0.58	0.4	12.01	1
F40	Woman	19	Normal vision	1.39	0.83	4.57	4.74	2.95	1.13	6.15	12.48	2.75	1.65	-0.56	-0.02	-0.32	1.83	1.1	1.37	4.5
F41	Woman	18	Corrected to normal vision	1.02	1.12	4.55	4.16	1.78	1.35	8.09	9.14	2.45	1.05	0.1	0.04	-0.05	0.42	1.4	2.77	3.5
F42	Woman	18	Normal vision	1.35	1.03	6.41	3.03	2.28	0.35	7.25	11.31	1.95	0.2	-0.32	0.34	-0.2	1.92	1.75	1.44	4
F43	Woman	19	Normal vision	1.63	1.27	4.61	4.82	3.35	2.78	7.86	10.41	3.6	3.35	-0.36	-0.02	-0.13	0.58	0.25	1.73	3.25
F44	Woman	18	Normal vision	1.1	0.82	4.77	4.42	2.13	0.93	7.07	11.22	1.45	0.9	-0.28	0.03	-0.21	1.2	0.55	1.71	2.25
F47	Woman	18	Normal vision	1.2	1.42	6.46	3.09	3.75	0	7.97	9.42	3.35	0	0.22	0.34	-0.07	3.75	3.35	2.61	3
F49	Woman	18	Corrected to normal vision	1.03	0.86	6.42	2.92	2.18	0.33	6.81	11.86	1.85	1	-0.17	0.35	-0.25	1.85	0.85	1.33	4.75
F51	Woman	19	Normal vision	2.07	1.69	4.59	4.51	0.43	0.23	6.25	8.98	0.65	0.25	-0.38	0.01	-0.14	0.2	0.4	4.77	2
F52	Woman	18	Normal vision	0.92	0.9	4.57	4.01	1.43	1.15	6.49	11.31	1.35	1.95	-0.01	0.06	-0.24	0.28	-0.6	2.2	2.25
F53	Woman	18	Normal vision	0.7	0.75	5.18	3.41	1	0.68	7.07	8.29	0.8	0.65	0.05	0.18	-0.06	0.32	0.15	4.64	2.75
F54	Woman	19	Normal vision	1.25	0.84	4.84	4.43	2	0.75	6.24	9.85	1.2	0.85	-0.4	0.04	-0.18	1.25	0.35	3.91	2.25
F55	Woman	18	Normal vision	0.77	1.72	5.42	3.03	0.73	0	9.14	9.48	0.4	0	0.94	0.24	-0.02	0.73	0.4	1.38	2
F56	Woman	18	Normal vision	0.64	2.19	3.37	1.03	1.1	0	8.4	9.09	0.8	0.05	1.56	0.23	-0.03	1.1	0.75	2.51	3.25
F58	Woman	19	Normal vision	0.74	0.87	7.83	1.17	3.95	0	8.89	9.03	4.5	0	0.12	0.67	-0.01	3.95	4.5	2.08	4.75
F59	Woman	18	Corrected to normal vision	1.94	1.23	4.69	4.52	1.98	0.95	4.67	13.17	1.1	1	-0.72	0.02	-0.43	1.03	0.1	2.17	3.25
F60	Woman	19	Normal vision	1.09	2.48	6.43	2.2	2.98	0.6	2.45	3.64	2.6	1.15	1.39	0.42	-0.06	2.38	1.45	13.91	4
F61	Woman	18	Normal vision	1.36	1.02	5.04	4.59	3.78	3.28	8.89	9.19	3.8	3.6	-0.34	0.05	-0.01	0.5	0.2	1.92	4
M01	Man	19	Corrected to normal vision	2.21	0.43	1.6	6.08	0.1	3.15	1.83	8.65	0.1	4.15	1.77	0.45	0.34	3.05	4.05	9.53	4.25
M02	Man	18	Normal vision	1.97	0.42	0.98	4.81	0	3.65	2.94	15.91	0	4.45	1.55	0.4	0.65	3.65	4.45	1.15	4.25
M03	Man	18	Corrected to normal vision	2.15	1.16	3.46	5.56	0.58	2.93	4.01	13.56	0.5	3.85	0.98	0.21	0.48	2.35	3.35	2.43	5.25
M05	Man	18	Corrected to normal vision	1.2	1.09	3.98	4.8	2.3	4.1	7.04	8.64	2.4	4.65	0.11	0.08	0.08	1.8	2.25	4.32	7
M06	Man	18	Corrected to normal vision	1.68	0.9	2.44	6.65	0	2.9	4.88	13.07	0	3.2	0.79	0.42	0.41	2.9	3.2	2.05	2.5
M07	Man	18	Normal vision	1.44	0.77	1.81	6.85	0.05	2.48	5.07	13.95	0.1	3.4	0.68	0.5	0.44	2.43	3.3	0.98	3.5
M09	Man	18	Normal vision	0.86	0.64	1.4	8.02	0.2	4.45	4.33	12.43	0	5.2	0.22	0.66	0.4	4.25	5.2	3.24	6
M11	Man	18	Corrected to normal vision	1.33	0.73	2.43	4.13	0.15	2.98	7.17	9.04	0	3.35	0.6	0.17	0.09	2.83	3.35	3.79	4.75
M12	Man	18	Normal vision	2.78	1.87	4.47	4.31	0.58	3.03	8.09	7.98	1.1	3.9	0.9	-0.02	-0.01	2.45	2.8	3.93	2.5
M14	Man	18	Normal vision	1.98	1.02	2.4	5.08	0	2.45	3.64	13.62	0	3.35	0.96	0.27	0.5	2.45	3.35	2.74	3.25
M15	Man	18	Corrected to normal vision	3.08	1.57	2.43	6.18	0	4.33	2.65	14.33	0	5.25	1.51	0.37	0.58	4.33	5.25	3.01	5.25
M18	Man	18	Corrected to normal vision	1.17	0.48	0.69	4.01	0	3.8	4.69	13.97	0	4.25	0.7	0.33	0.46	3.8	4.25	1.35	3.25
M19	Man	20	Normal vision	1.17	0.74	0.47	4.53	0	1.9	5.52	11.85	0	2.6	0.43	0.43	0.32	1.9	2.6	2.63	1
M20	Man	21	Normal vision	3	0.62	2.62	5.75	0.13	2.8	2.76	14.42	0.1	3.45	2.38	0.31	0.58	2.68	3.35	2.83	3.75
M21	Man	18	Normal vision	1.95	0.45	1.98	7.12	0	2.13	2.57	16.17	0.05	3.9	1.5	0.52	0.68	2.13	3.85	1.26	5.25
M24	Man	19	Corrected to normal vision	1.14	1.18	3.89	4.35	1.5	3.1	4.56	6.22	1.4	3.65	-0.04	0.05	0.08	1.6	2.25	9.23	4.25
M25	Man	18	Corrected to normal vision	1.06	0.62	0.71	7.83	0	3.65	1.45	11.13	0	4	0.44	0.72	0.48	3.65	4	7.41	3.5
M26	Man	19	Normal vision	1.61	0.57	2.79	6.29	0	1.23	7.52	10.83	0	1.9	1.04	0.35	0.17	1.23	1.9	1.66	1.75
M27	Man	20	Corrected to normal vision	2.68	0.75	1.29	6.97	0	1.98	3.29	14.68	0	3.3	1.93	0.57	0.57	1.98	3.3	2.03	2.75
M28	Man	18	Normal vision	1.54	1.21	1.88	5.71	0	4.8	3.32	13.58	0	5.1	0.33	0.38	0.51	4.8	5.1	3.1	5.5
M29	Man	18	Corrected to normal vision	2.88	0.5	1.5	7.7	0	3.3	3.59	13.83	0	4.85	2.38	0.63	0.51	3.3	4.85	2.58	4.5
M30	Man	22	Normal vision	1.48	1.21	4.06	5.02	1.03	1.78	7.29	11.24	1.2	1.75	0.28	0.1	0.2	0.75	0.55	1.48	2
M31	Man	19	Normal vision	2.51	1.75	3.86	5.37	0.08	2.6	4.09	13.52	0.65	4.25	0.76	0.15	0.47	2.53	3.6	2.38	5.75
M33	Man	21	Normal vision	2.26	1.07	2.21	6.48	0.2	3.53	4.06	12.83	0.05	4.15	1.2	0.43	0.44	3.32	4.1	3.11	4.5
M34	Man	18	Normal vision	1.29	0.59	1.92	3.93	0.68	5.63	5.14	9.9	0.3	5.8	0.7	0.2	0.24	4.95	5.5	4.96	6.75
M36	Man	19	Normal vision	1.99	1.15	2.32	4.95	0.03	2.75	5.78	12.09	0.1	3.05	0.84	0.26	0.32	2.73	2.95	2.13	4
M37	Man	18	Normal vision	1.59	0.71	3.66	4.83	0.03	2.18	5.52	10.7	0	2.2	0.87	0.12	0.26	2.15	2.2	3.78	1
M39	Man	18	Normal vision	2.18	1.46	1.1	3.46	0.1	1.28	5.33	11.51	0.05	2.55	0.72	0.24	0.31	1.17	2.5	3.16	2.5
M40	Man	18	Normal vision	0.89	0.83	4.37	4.39	0.53	3.83	4.6	12.05	0.15	3.3	0.05	0	0.37	3.3	3.15	3.35	2.25
M41	Man	22	Corrected to normal vision	2.56	0.67	1.93	5.13	0	2.53	4.37	13.01	0.2	3.1	1.89	0.32	0.43	2.53	2.9	2.62	2
